# Supplementary material for: Rapid label-free visual detection of KRAS mutations using peptide nucleic acid and unmodified gold nanoparticles
Source: Royal Society of Chemistry journal article supplement (doi:10.1039/c7ra09088a), 2017-01-01
Supplement: c7ra09088a1.pdf [file c7ra09088a1.pdf]

## Supplementary information

For

### **Rapid label-free visual detection of KRAS mutations using peptide nucleic acid and unmodified gold nanoparticles**

Xihong Zhao<sup>a,b</sup>, Chii-Wann Lin<sup>b\*</sup>

*<sup>a</sup> Key Laboratory for Green Chemical Process of Ministry of Education, Key Laboratory for Hubei Novel Reactor & Green Chemical Technology, Research Center for Environmental Ecology and Engineering, School of Chemical Engineering and Pharmacy, Wuhan Institute of Technology, Wuhan 430073, China.*

*<sup>b</sup> Institute of Biomedical Engineering, National Taiwan University, Taipei 10617, Taiwan.*

Running title: Colorimetric detection of KRAS mutations

\*Corresponding author: Prof. Chii-Wann Lin, Ph.D

National Taiwan University, No.1, Sec.4, Roosevelt Road, Taipei, Taiwan, 10671

Tel: 886-2-33665272

Fax: 886-2-33665268

E-mail: cwlinx@ntu.edu.tw; xcwlin@gmail.com;

**Scheme S1.** Schematic illustration of how different nucleic acids (PNA, PNA-DNA complexes and PNA-DNA mixture) affect AuNPs' intrinsic stability and AuNPs' stability against salt.

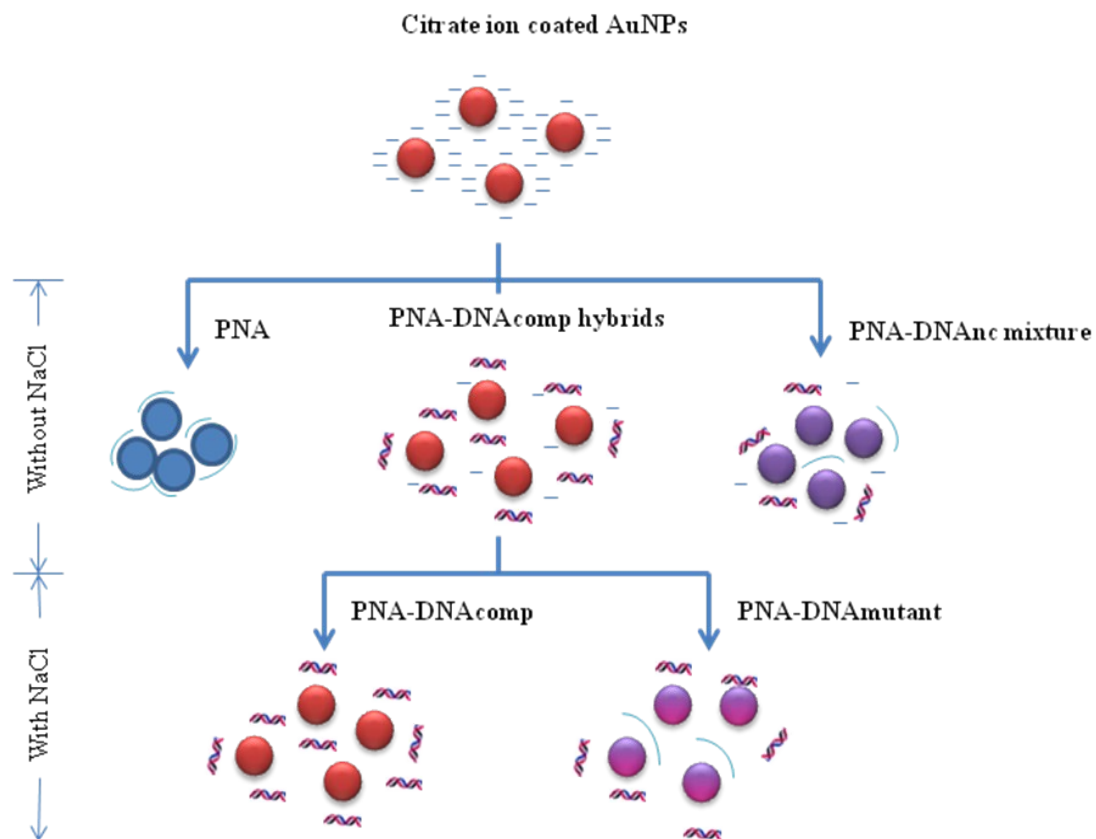

Figure S1. Colorimetric detection of PNA hybridization with specific sequence using PNA-induced AuNPs aggregation. Photographs and corresponding adsorption spectra of bare AuNPs solutions (A), and AuNPs solutions with 100 pmol PNA (B), AuNPs solutions containing with 100 pmol in the presence of 1  $\mu$ M DNComp (C) and 1  $\mu$ M DNanc (D) in 100  $\mu$ l volume. Photographs of A'-D' are solutions A-G containing 0.1 M NaCl (the corresponding spectra not shown).

Figure S1 (A)

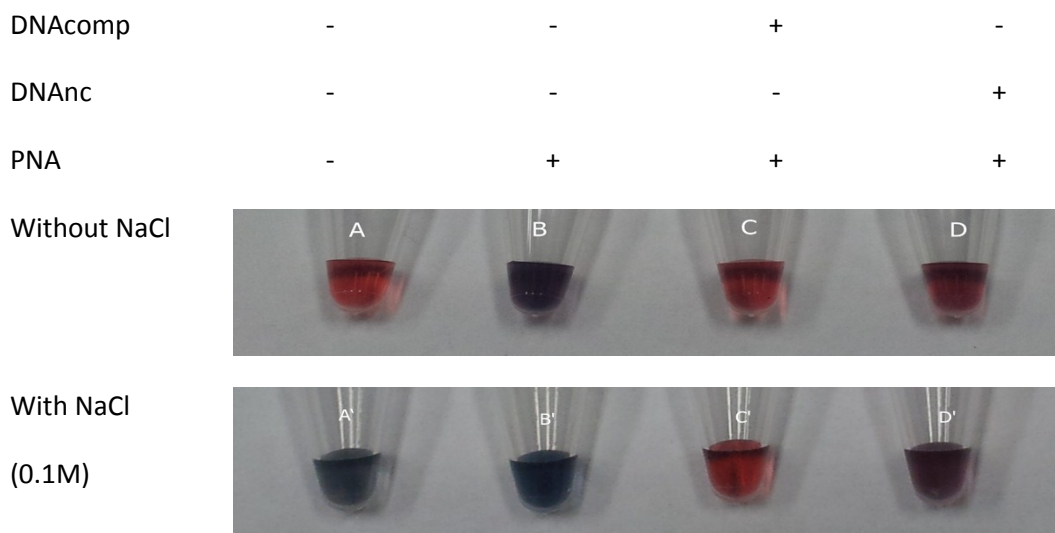

Figure S1 (B)

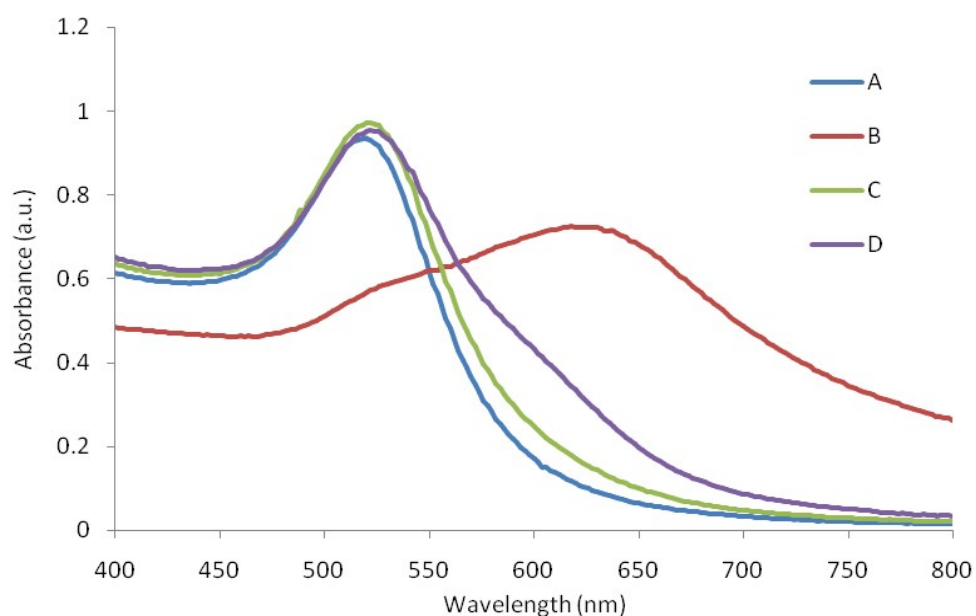

Table S1. PNA and DNA sequences in this study

| Name    | Codon | Sequences(5'-3') <sup>a</sup> | Base change | Amino acid change |
|---------|-------|-------------------------------|-------------|-------------------|
| PNA     |       | CCTACGCCACCAGCTCC             |             |                   |
| DNAcomp |       | GGAGCTGGTGGCGTAGG             |             |                   |
| DNAnc   |       | TATTATAAGGCCTGCTG             |             |                   |
| m1      | 12    | GGAGCTAGTGGCGTAGG             | G129A       | Gly12Ser          |
| m2      | 12    | GGAGCTCGTGGCGTAGG             | G129C       | Gly12Arg          |
| m3      | 12    | GGAGCTTGTGGCGTAGG             | G129T       | Gly12Cys          |
| m4      | 12    | GGAGCTGATGGCGTAGG             | G130A       | Gly12Asp          |
| m5      | 12    | GGAGCTGCTGGCGTAGG             | G130C       | Gly12Ala          |
| m6      | 12    | GGAGCTGTTGGCGTAGG             | G130T       | Gly12Val          |
| m7      | 13    | GGAGCTGGTTGCGTAGG             | G131T       | Gly13Cys          |

<sup>a</sup> Altered bases were underlined.
